# Supplementary material for: Randomized Controlled Cross-over Study for Hot Flash Management: Efficacy Novel Wrist Cooling Device in Cancer Treatment-Induced and Menopausal Vasomotor Symptoms
Source: Research Square preprint supplement (doi:10.21203/rs.3.rs-6173150/v1), 2025-05-07
Supplement: Supplementary file 2 [file cf3e230d6075ec99b9e76b8c.pdf]

Peripheral Thermoregulatory Modulation for Hot Flash Management: Efficacy of Novel Wrist Cooling Device in Cancer Treatment-Induced and Menopausal Vasomotor Symptoms

Nazlı Uçar, Arash Shirvani, Michael F. Holick

Section of Endocrinology, Diabetes, Nutrition and Weight Management, Department of Medicine, Boston University, Chobanian & Avedisian School of Medicine, Boston, MA 02118, USA
