# Supplementary figures and images for: Randomized Controlled Cross-over Study for Hot Flash Management: Efficacy Novel Wrist Cooling Device in Cancer Treatment-Induced and Menopausal Vasomotor Symptoms
Source: Research Square preprint supplement (doi:10.21203/rs.3.rs-6173150/v1), 2025-05-07

## CONSORT 2010 Flow Diagram

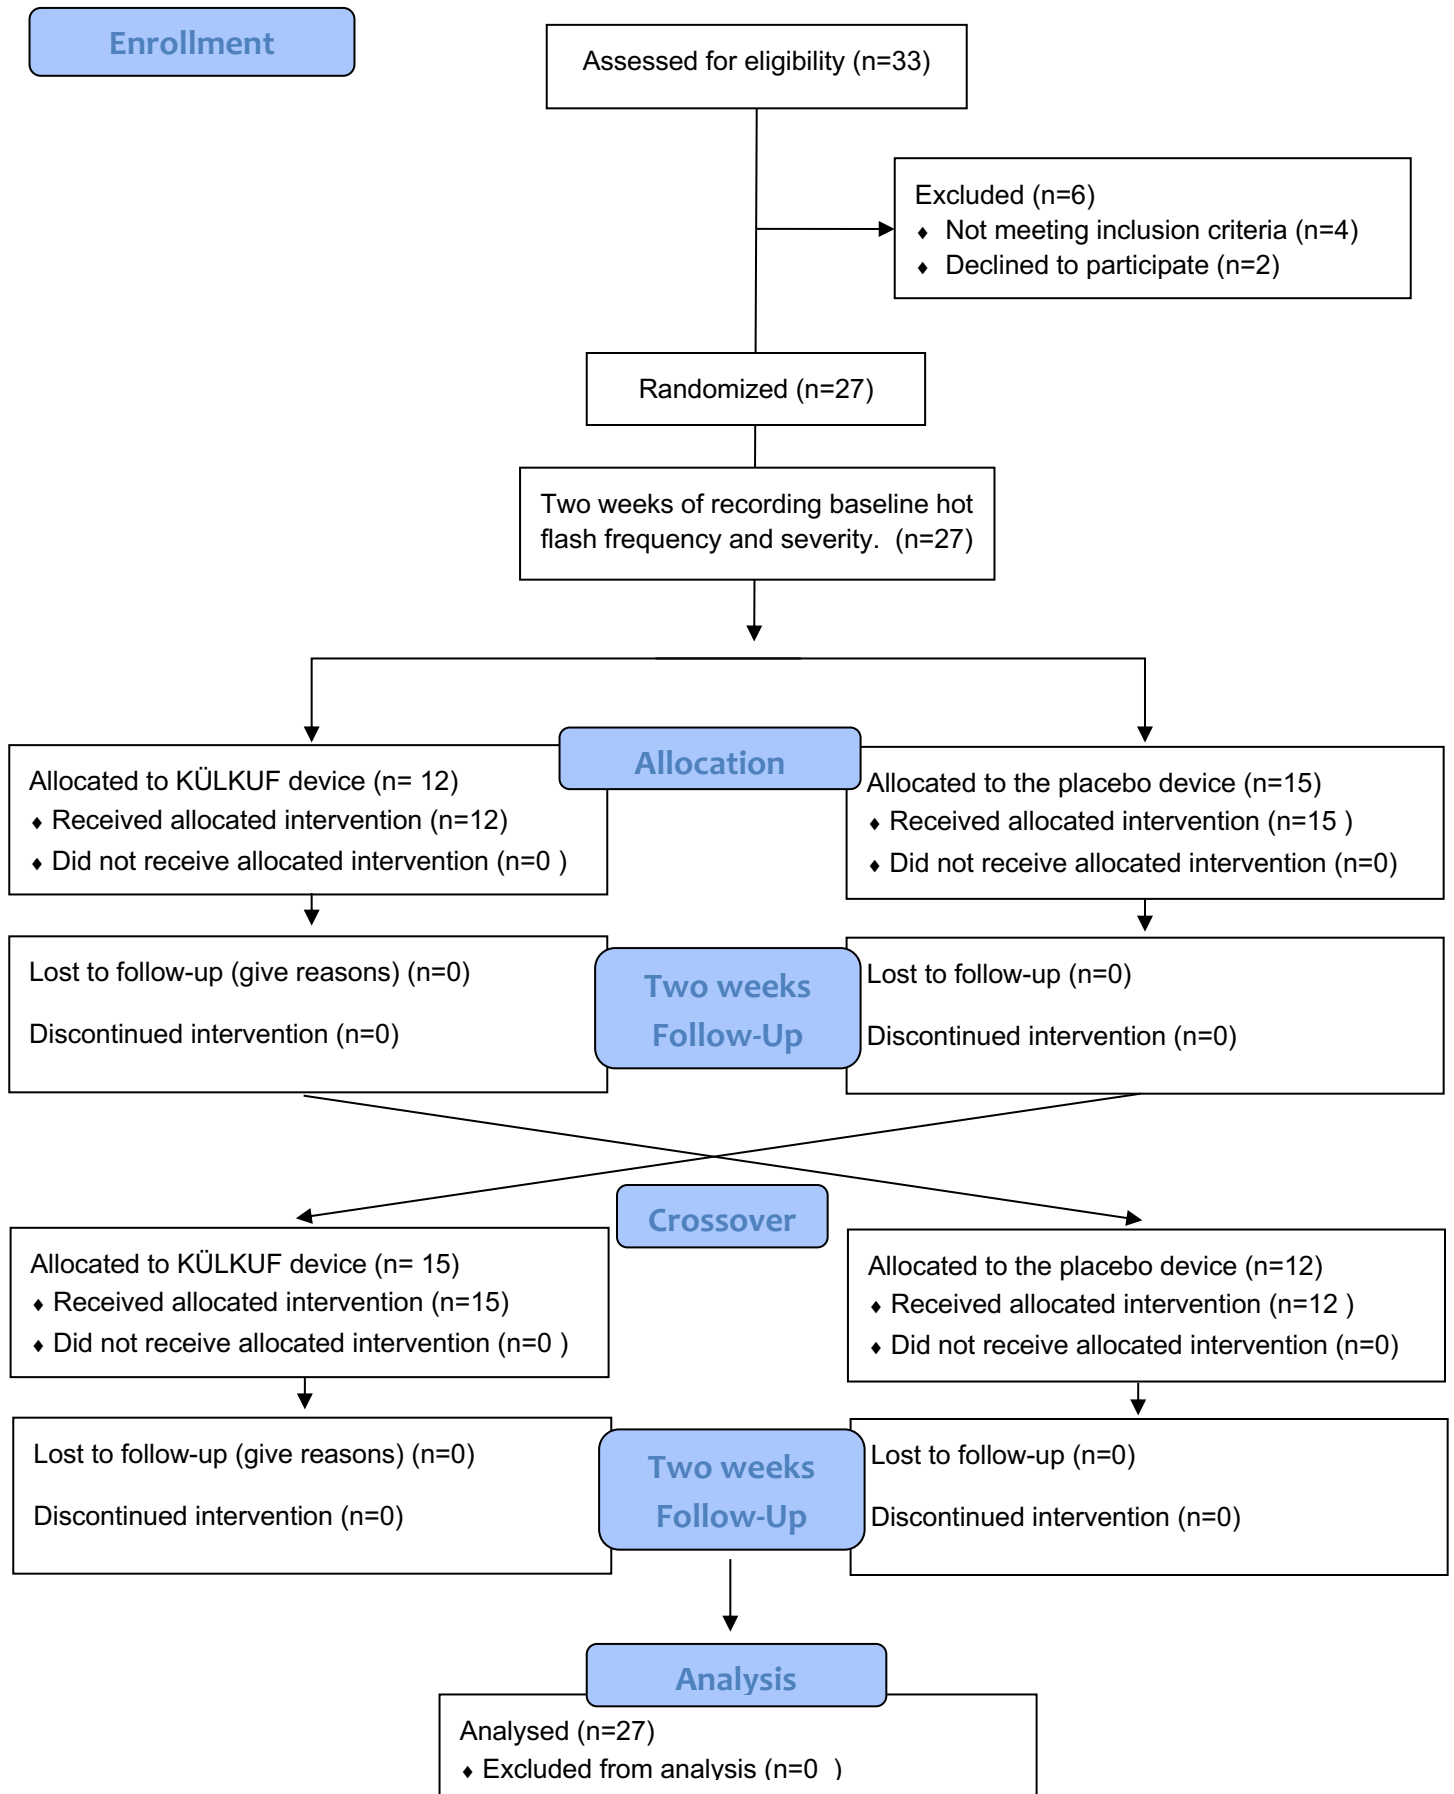

Supplement: Supplementary file 1 [file 5b5242ab63a1d7f1e7e7013b.pdf]
